# Supplementary material for: Feasibility of Using Electrical Impedance Spectroscopy for Assessing Biological Cell Damage during Freezing and Thawing
Source: MDPI journal article supplement (doi:10.3390/s21124129), 2021-06-16
Supplement: s1 [file s1]

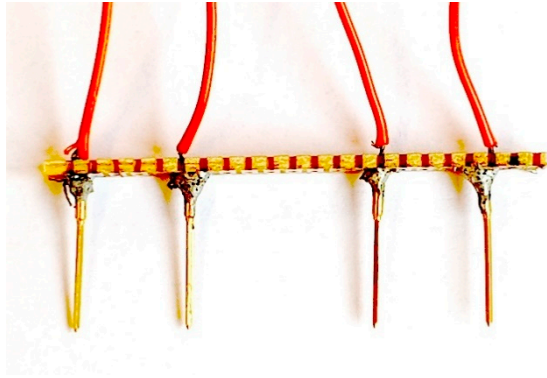

**Figure S1.** Photo showing the tetrapolar impedance probe. Distances between the individual pins are 1.1 cm, 2.2 cm, and 1.1 cm, respectively.
